# Supplementary material for: The Impact of a Very-Low-Calorie Ketogenic Diet in the Gut Microbiota Composition in Obesity
Source: MDPI journal article supplement (doi:10.3390/nu15122728), 2023-06-13
Supplement: s1 [file s1]

**Supplementary Table S1.-** Gut microbiota microorganisms' abundance in individuals with obesity compared to individuals on a VLCKD.

| Microorganism                         | Abundance in obesity                 | Abundance in VLCKD diet        |
|---------------------------------------|--------------------------------------|--------------------------------|
| <i>Bacteroidetes</i>                  | Decreased abundance [41,45]          | Increased abundance [55,63,68] |
|                                       | Increased abundance [43,44]          |                                |
|                                       | Not significant differences [46]     |                                |
| <i>Firmicutes</i>                     | Increased abundance [41,45,47,48,50] | Increased abundance [55,72]    |
|                                       | Decreased abundance [43,44]          | Decreased abundance [63,68]    |
|                                       | Not significant differences [46]     |                                |
| <i>Firmicutes/Bacteroidetes ratio</i> | Increased ratio [38,45,47]           | Decreased ratio [68]           |
|                                       | Decreased ratio [43]                 |                                |
| <i>Proteobacteria</i>                 | Increased abundance [52]             | Increased abundance [68]       |
|                                       |                                      | Decreased abundance [55]       |
| <i>Verrucomicrobiota</i>              | Decreased abundance [72]             | Increased abundance [72]       |
| <i>Bifidobacterium</i>                | Decrease abundance [42,44]           | No information                 |
| <i>Euryarchaeota</i>                  | Decrease abundance [44]              | No information                 |
| <i>Actinobacteria</i>                 | Decrease abundance [42,44]           | Decreased abundance [68,72]    |
|                                       | Increase abundance [45]              |                                |
